# Supplementary material
Source: PubMed Central journal article supplement (PMC2930561)
Supplement: 1003336107_pnas.1003336107_SI.pdf [file 1003336107_pnas.1003336107_SI.pdf]

# Supporting Information

Liu and Curry 10.1073/pnas.1003336107

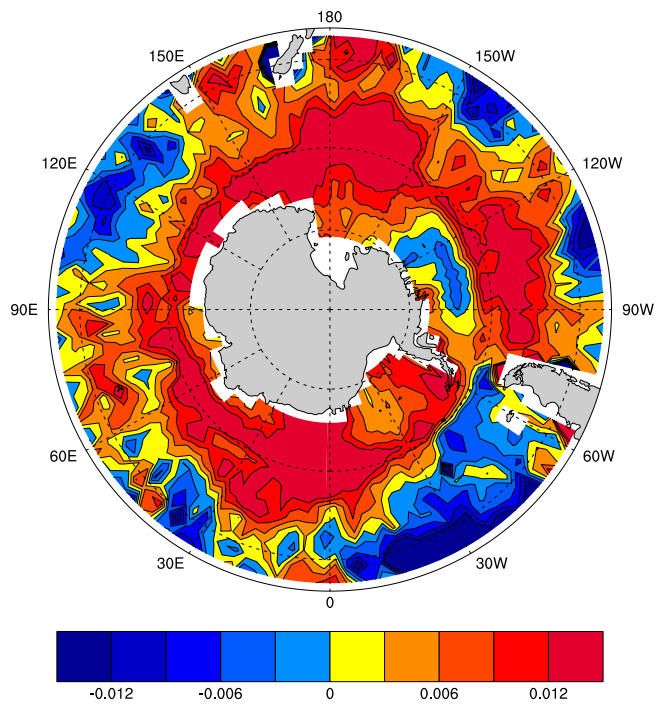

Fig. S1. The linear trend of precipitation from the Global Precipitation Climatology Project (mm/day) for the period 1979–1999.

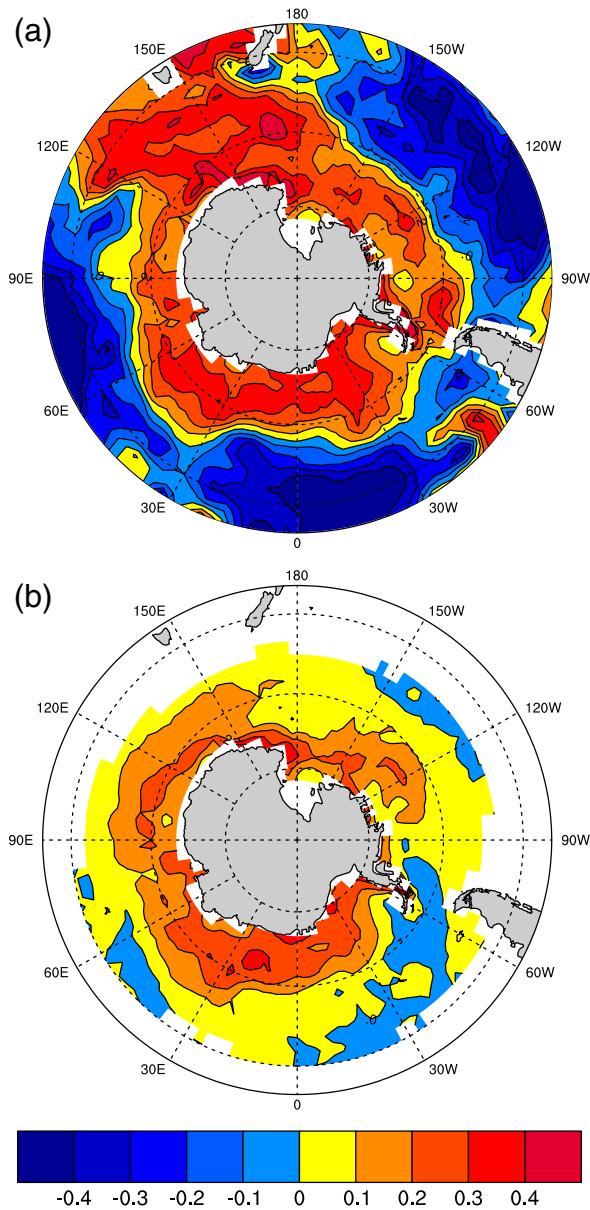

**Fig. 52.** Differences in (A) the total precipitation (liquid precipitation + snowfall, mm/day) and (B) snowfall (mm/day) between the 1990s and 1958–1967 for the ERA40 reanalysis.

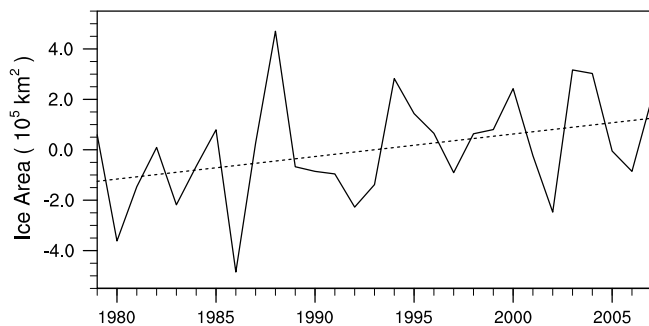

**Fig. 53.** Time series of the observed total Antarctic sea ice area anomaly ( $\times 10^5$  km<sup>2</sup>) for the period 1979–2007.
